# Supplementary material for: Transcriptome and proteome dynamics in larvae of the barnacle Balanus Amphitrite from the Red Sea
Source: PubMed Central journal article supplement (PMC4678614; doi:10.1186/s12864-015-2262-1), 2015-12-15
Supplement: 12864_2015_2262_MOESM10_ESM.pdf [file 12864_2015_2262_MOESM10_ESM.pdf]

Additional file 10: Table S13. Environmental differences between Red Sea\* and Hong Kong\*\* marine environment. The measurements were taken from the locations where the sampling was conducted. (Hong Kong water measurement values are indicated in parentheses).

| <b>Parameter</b>           | <b>Location 1</b> | <b>Location 2</b> | <b>Location 3</b> | <b>Average</b>   | <b>STDEV</b>     |
|----------------------------|-------------------|-------------------|-------------------|------------------|------------------|
| Salinity (psu)             | 42.14<br>(31.2)   | 42.59<br>(31.3)   | 42.22<br>(31.4)   | 42.31<br>(31.3)  | 0.24<br>(0.1)    |
| Temperature (°C)           | 34.4<br>(29.5)    | 33.6<br>(29)      | 34.7<br>(29)      | 34.23<br>(29.16) | 0.568<br>(0.288) |
| pH                         | 8.2<br>(8.2)      | 8.17<br>(8.1)     | 8.23<br>(8.1)     | 8.2<br>(8.13)    | 0.03<br>(0.05)   |
| Dissolved Oxygen<br>(mg/L) | 4.32<br>(7.3)     | 5.22<br>(6.2)     | 5.66<br>(6.1)     | 5.06<br>(6.53)   | 0.683<br>(0.665) |

\*King Abdullah University of Science and Technology (27°18'168"N, 35°05'661"E), Thuwal, Kingdom of Saudi Arabia

\*\*Pak Sha Wan (22°21'45"N, 114°15'35"E), Water Control Zone, Hong Kong environmental protection department, Hong Kong.
