# Supplementary material for: Transcriptome and proteome dynamics in larvae of the barnacle Balanus Amphitrite from the Red Sea
Source: PubMed Central journal article supplement (PMC4678614; doi:10.1186/s12864-015-2262-1), 2015-12-15

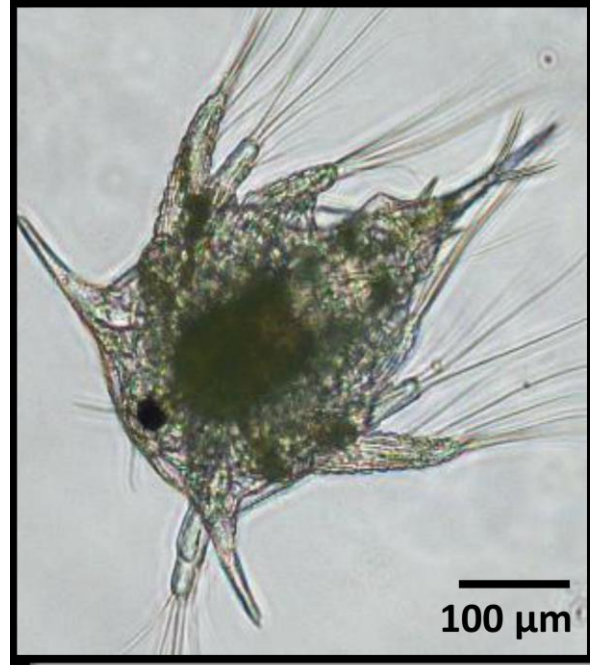

Supplement: 12864_2015_2262_MOESM11_ESM.pdf [file 12864_2015_2262_MOESM11_ESM.pdf]
